# Supplementary material
Source: MDPI journal article supplement (https://www.mdpi.com/2073-4433/14/4/739)
Supplement: s1 [file s1]

# Supplementary Materials:

Fusheng Mou <sup>1,2</sup>, Jing Luo <sup>1,2</sup>, Qijin Zhang <sup>1,2</sup>, Chuang Zhou <sup>1,2</sup>, Song Wang <sup>1,2</sup>, Fan Ye <sup>1,2</sup>, Suwen Li <sup>1,2</sup> and Youwen Sun <sup>3,\*</sup>

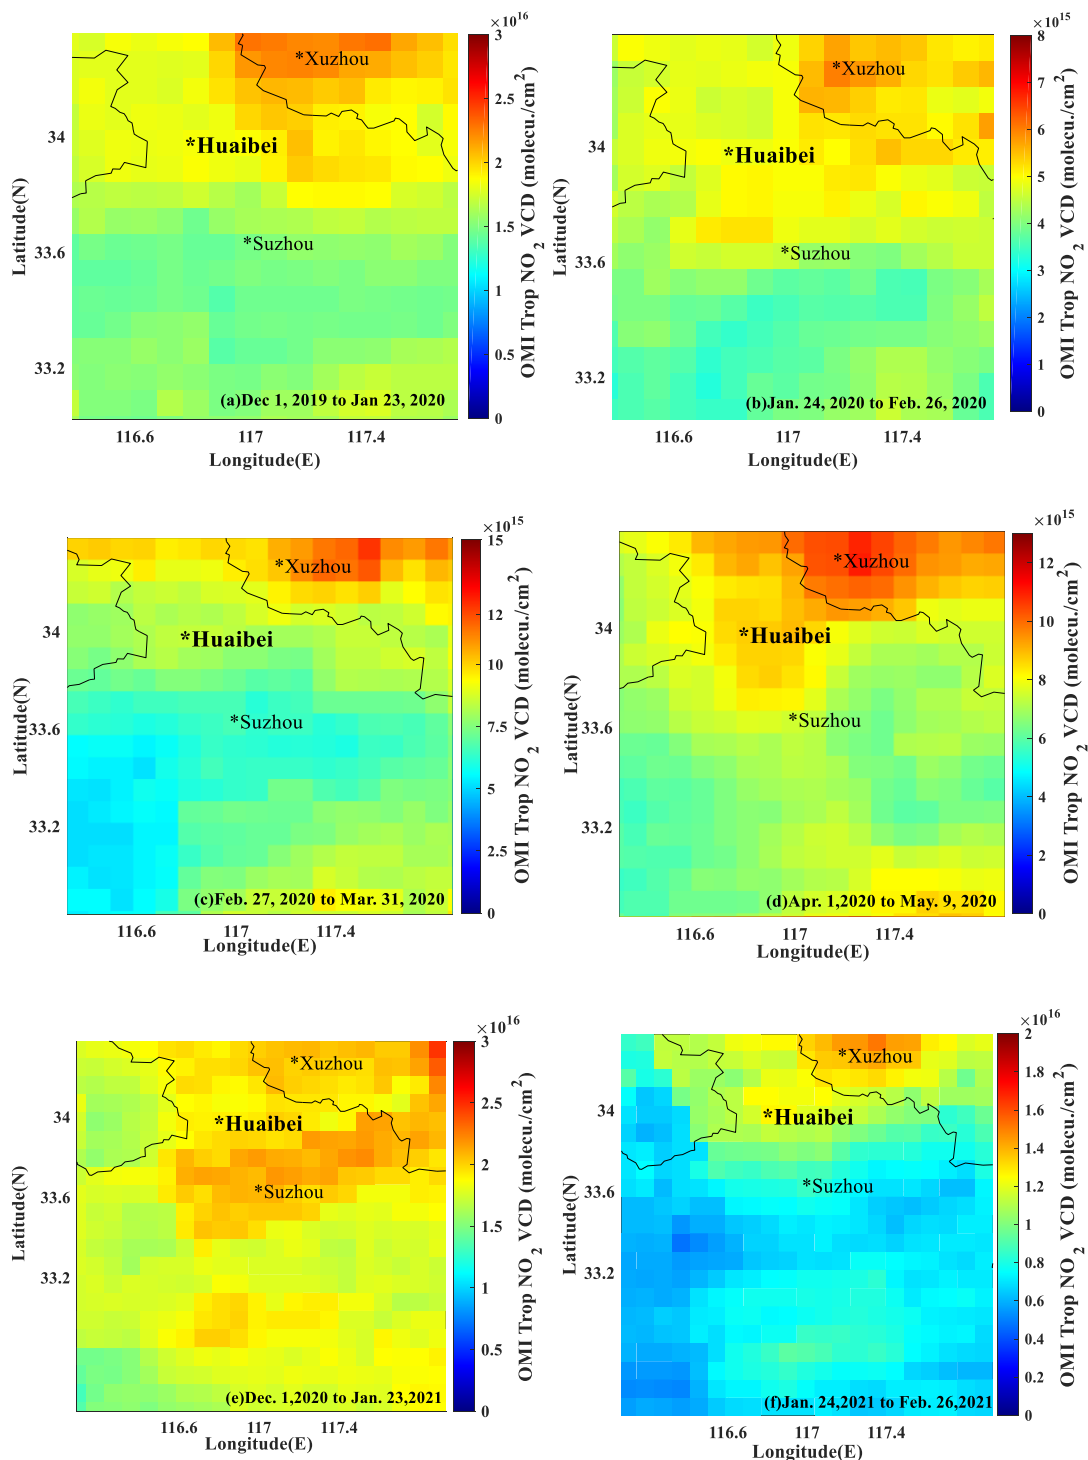

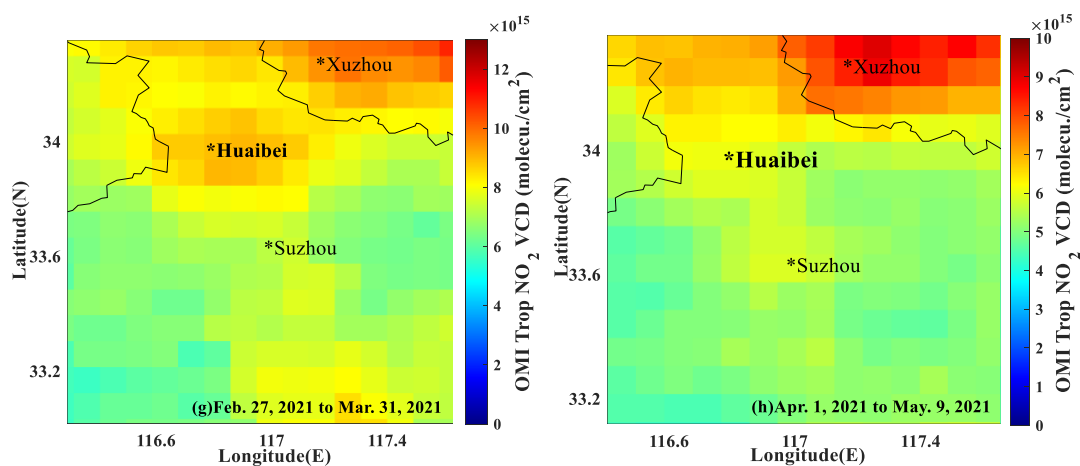

**Figure S1.** Daily average results of NO<sub>2</sub> from OMI satellites in different time periods. (a)-(d) is result of the four stages from 1 December 2019 to 9 May 2020. (e)-(h) is result of the four stages from 1 December 2020 to 9 May 2021.

**Table S1.** Different filters and corresponding thresholds applied to the retrieved SCDs.

| NO <sub>2</sub> |            | HCHO      |            | SO <sub>2</sub> |            |
|-----------------|------------|-----------|------------|-----------------|------------|
| Fiter           | Percentage | Fiter     | Percentage | Fiter           | Percentage |
| SZA<75°         | 22.7%      | SZA<75°   | 22.8%      | SZA<75°         | 22.7%      |
| RMS<0.003       | 0.6%       | RMS<0.003 | 0.4%       | RMS<0.005       | 2.6%       |

**Table S2.** The average concentration changes of three gases in four time periods in 2021 compared with the same period in 2020.

| 2021 vs 2020    | Pre-lockdown | Phase 1 | Phase 2 | Post-lockdown |
|-----------------|--------------|---------|---------|---------------|
| NO <sub>2</sub> | +6%          | +41%    | +1%     | -9%           |
| HCHO            | +20%         | +14%    | +5%     | -8%           |
| SO <sub>2</sub> | +32%         | +14%    | 0%      | -16%          |

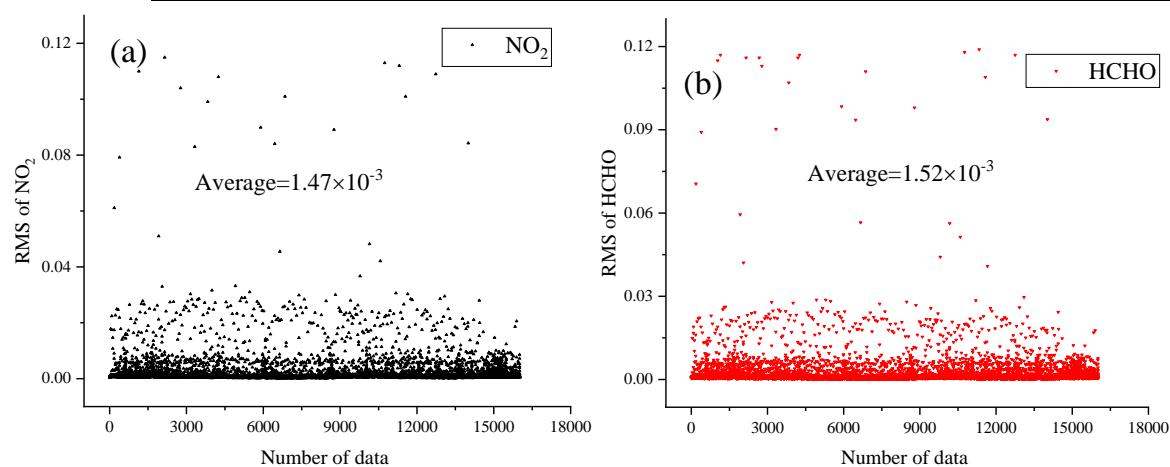

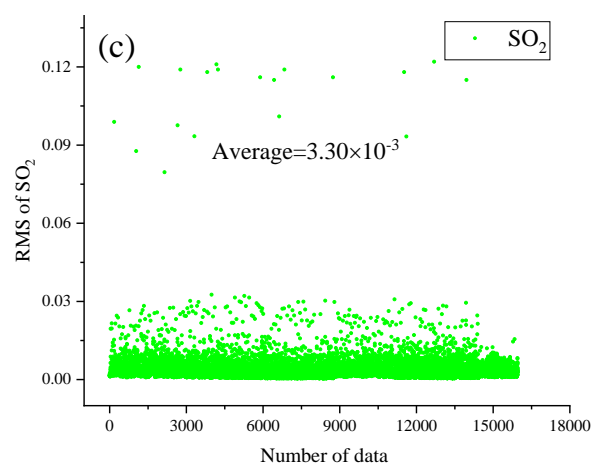

Figure S2. The RMS results of measured spectra during the entire observation period.

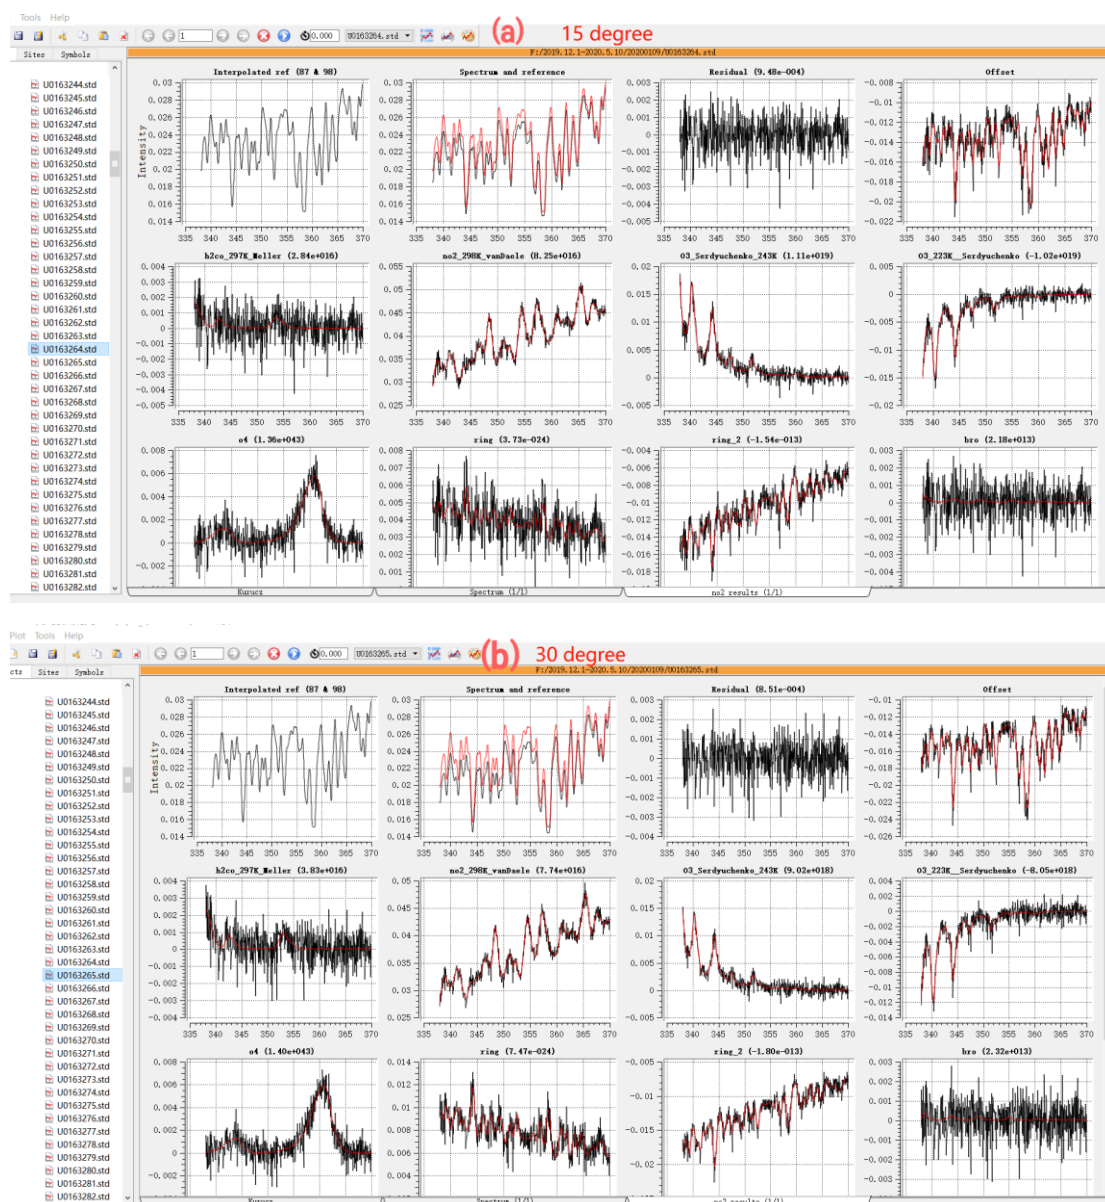

Figure S3. The result of the (a) 15° and (b) 30° angles in the same measurement cycle for NO<sub>2</sub> gas in Figure 2 in the main manuscript.
